# Supplementary material
Source: publisher figshare collection journal article supplement (https://sage.figshare.com/ndownloader/files/13986686)
Supplement: Supplementary file 1 [file 13986686]

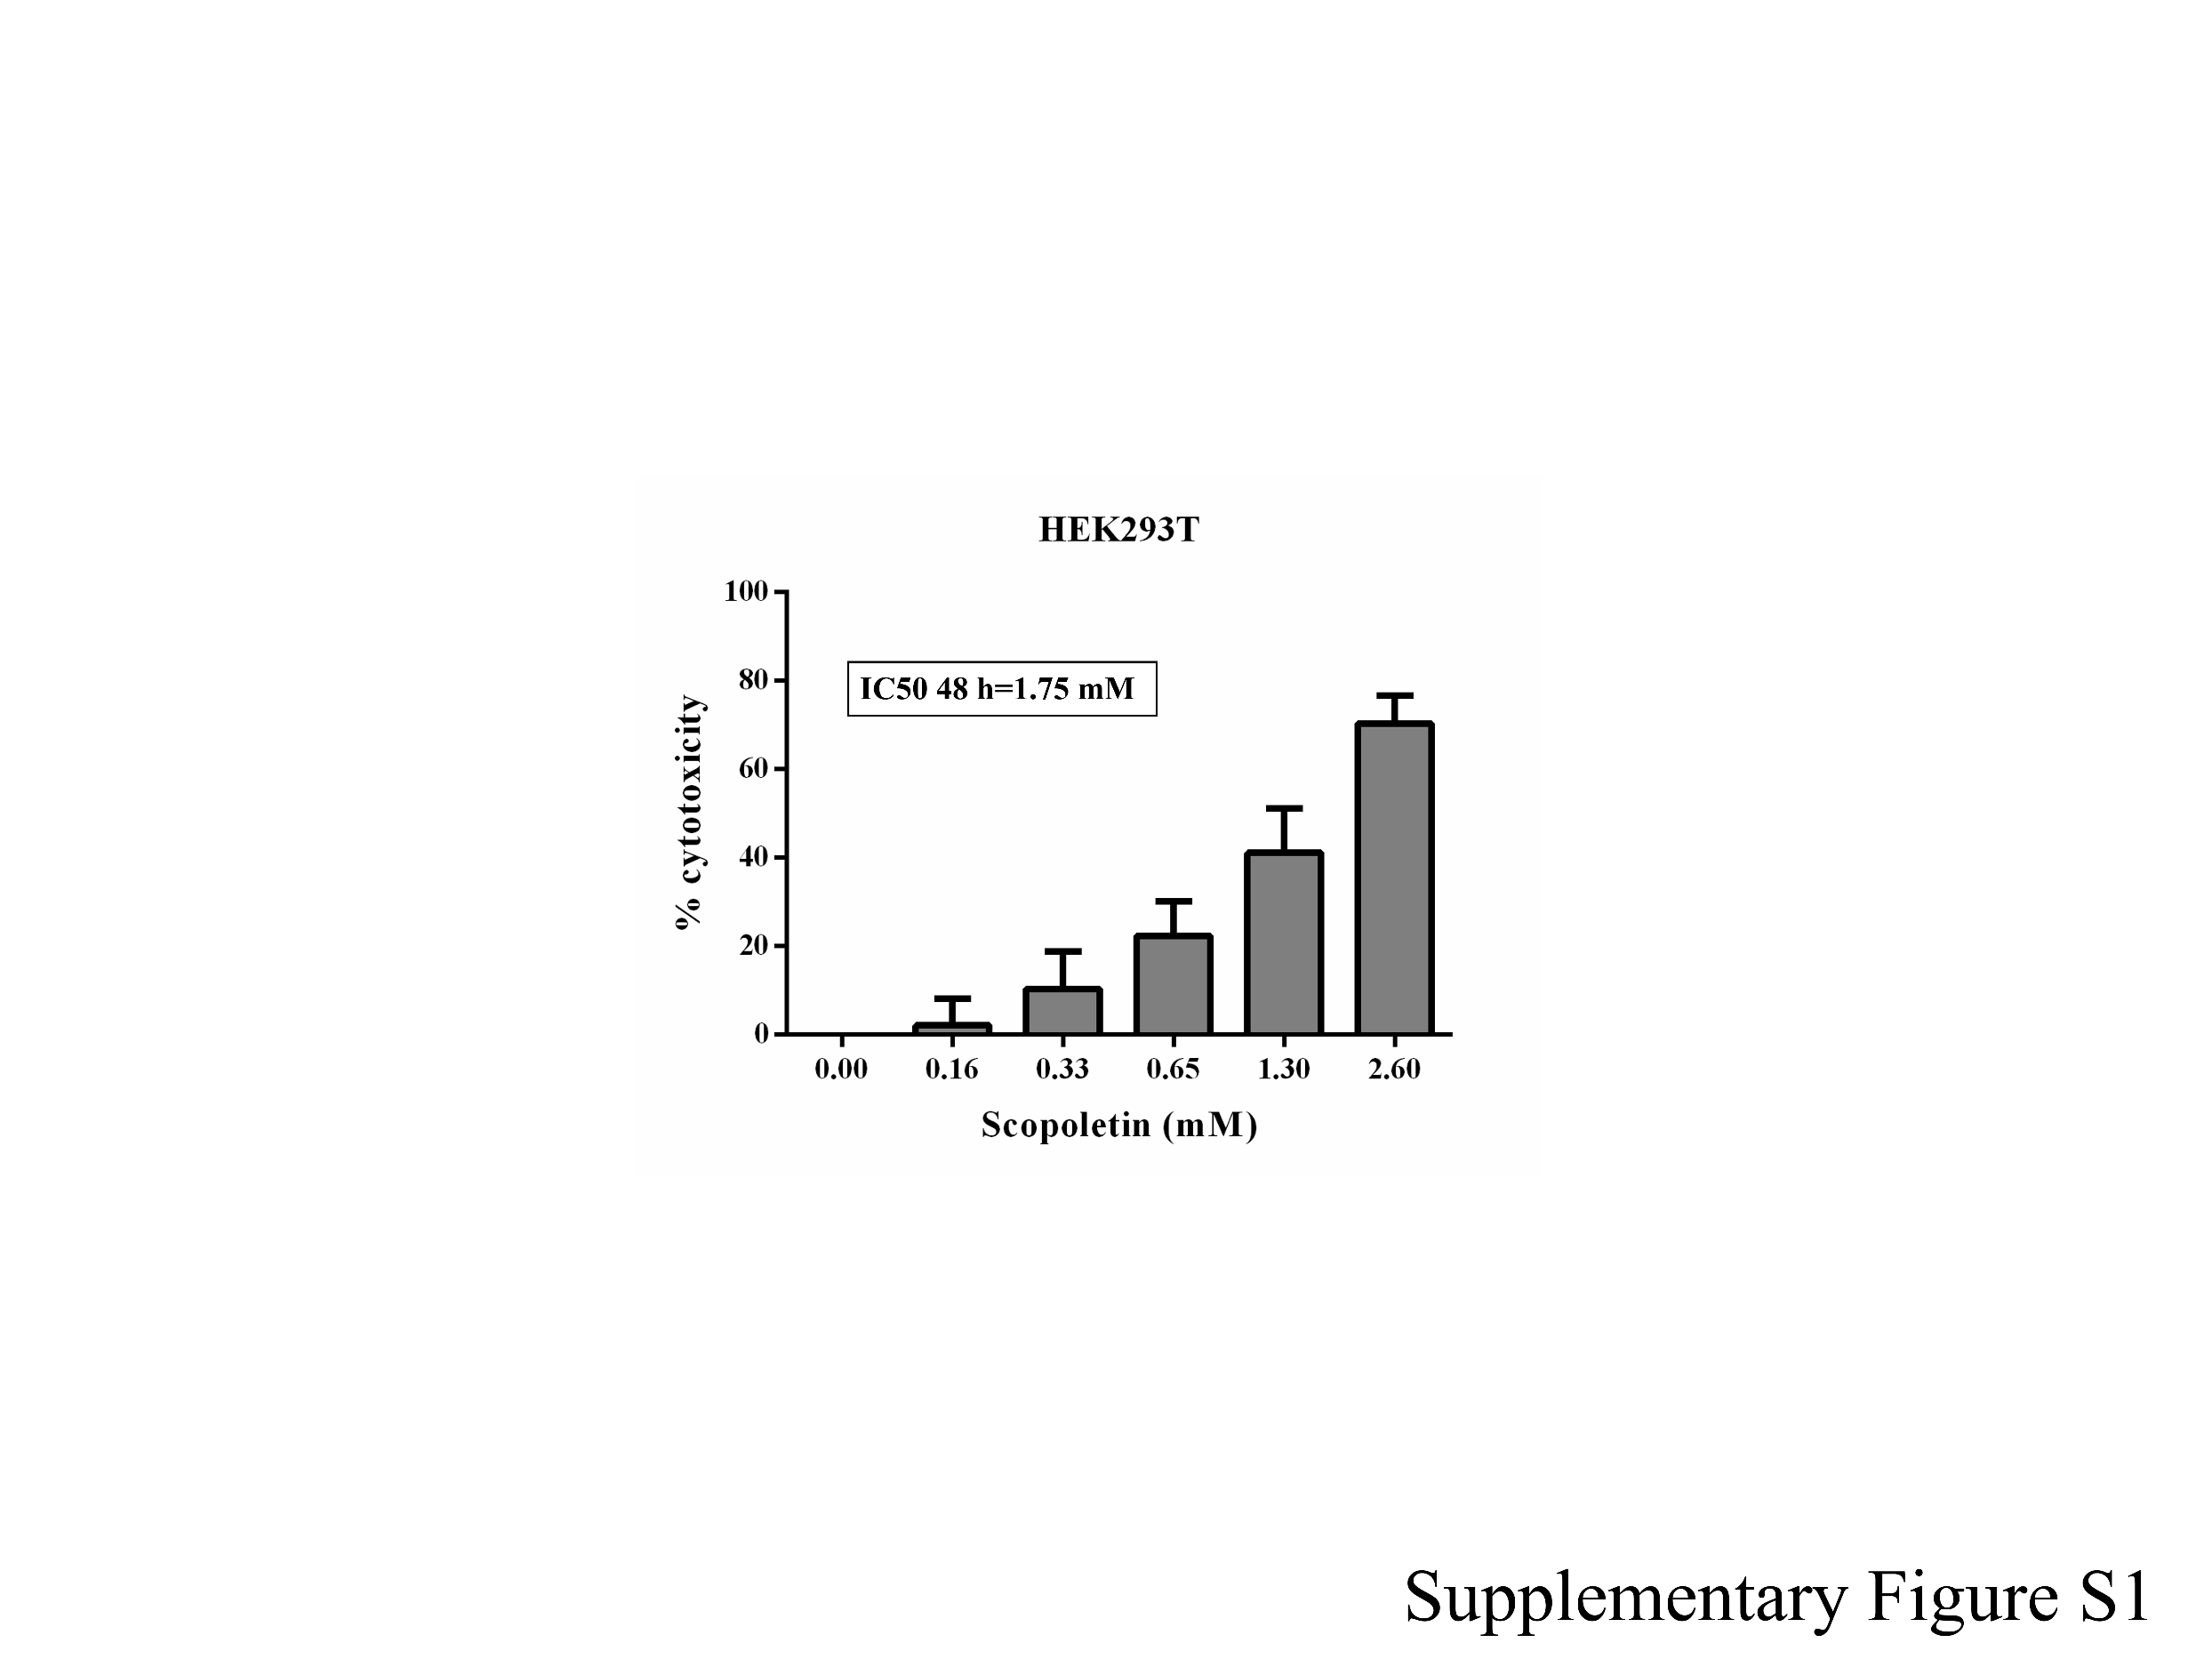


**Supplementary Figure S1**. Cytotoxic effect of the scopoletin in HEK293T cells as measured by MTT assay. Cells were treated with various concentrations of scopoletin for 48 hours. The IC50 value was computed using a nonlinear regression model. The value for each concentration tested expressed as mean ± SD of two independent experiments with three replicates.
